# Supplementary material
Source: PubMed Central journal article supplement (PMC5695696)
Supplement: NIHMS914120-supplement-Supplemental_info.pdf [file NIHMS914120-supplement-Supplemental_info.pdf]

# Figure S1

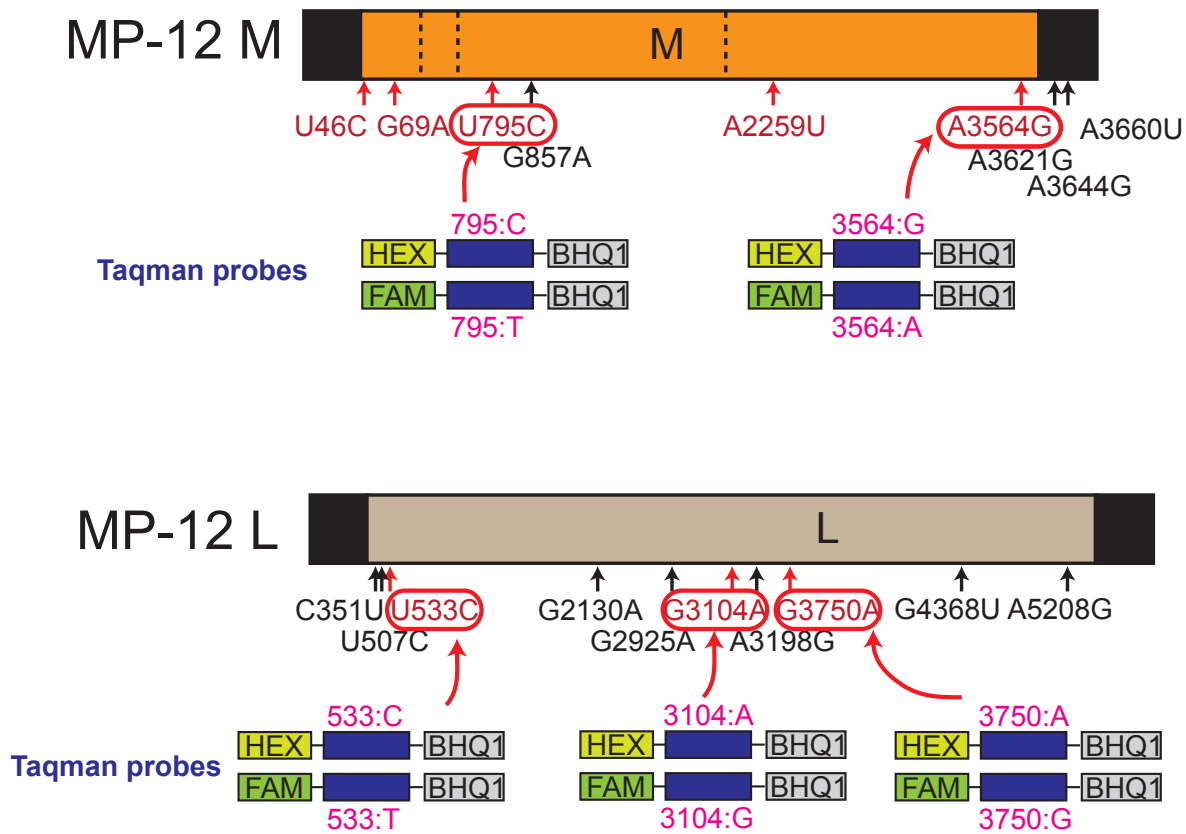

**Fig. S1. Probe design for M-795, M-3564, L-533, L-3104, and L-3750.** We designed two Taqman DNA probes at the M-795, M-3564, L-533, L-3104, and L-3750 sites. One probe was 5' conjugated with either hexachlorofluorescein (HEX; Absorbance max: 535 nm; Emission max: 556 nm) to detect parental MP-12 genotype, or 6-carboxyfluorescein (6-FAM; Absorbance max: 494 nm; Emission max: 518 nm) to detect mutant genotype reverted to pathogenic genotype. The other probe was 3' conjugated with Black Hole Quencher-1 (BHQ-1). Sequences of probes and primers are shown in Table S2.

# Figure S2

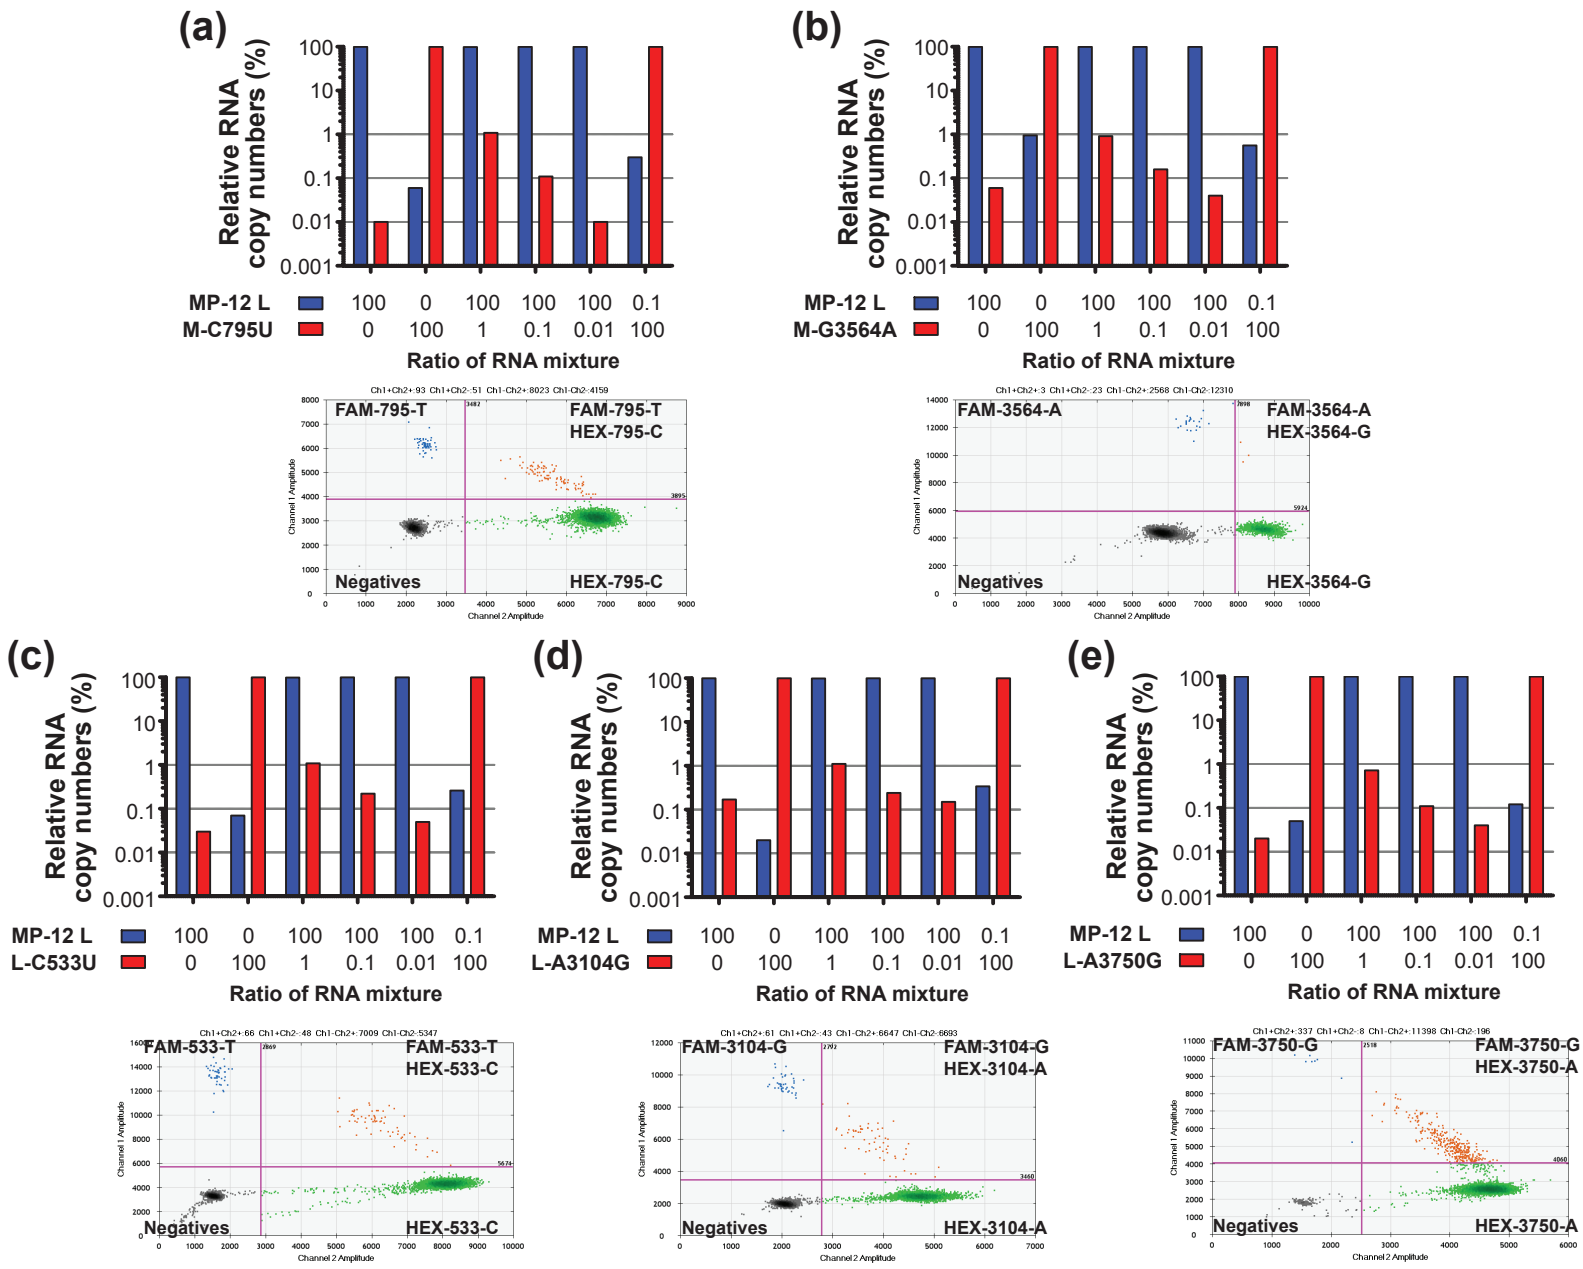

**Fig. S2. Validation of ddPCR using Taqman probes for M-795, M-3564, L-533, L-3104, and L-3750.** The accuracy of ddPCR assays were validated using five different Taqman probe sets. Full-length MP-12 M- or L-segment RNAs were in vitro synthesized by MEGAscript T7 Transcription kit (Thermofisher), using linearized pProT7-vM(+) or pProT7-vL(+) plasmids, respectively. In vitro synthesized full-length M- or L-segment RNAs encoding M-C795U, M-G3564A, L-C533U, L-A3104G, or L-A3750G (mutant RNA) were prepared. Synthesized parental MP-12 RNA and mutant RNA were mixed at ratios of 100:0, 0:100, 100:1, 100:0.1, 100:0.01, or 0.1:100. First-stranded cDNA was then synthesized and ddPCR was performed, as described in Material and Methods. The ddPCR results for M-795 (a), M-3564 (b), L-533 (c), L-3104 (d), and L-3750 (e) are shown. The graph represents the relative percentage of parental and mutant genotype RNA copy numbers. Bottom panels represent the raw images of QX100 Droplet Reader output [parental (HEX): mutant (FAM) = 100:1].

**Table S1. Genome sequences of plaque clones from passage 25 samples in Vero cells**

| Virus                   | Segment                            | Gene     | Location          | nt. Mutation <sup>1</sup> | aa. Mutation <sup>2</sup> | Plaque clone # |   |
|-------------------------|------------------------------------|----------|-------------------|---------------------------|---------------------------|----------------|---|
| MP-12<br>Vero P25 Exp-1 | S                                  | N        | 183               | G to A                    | D to N                    | 2,3            |   |
|                         |                                    | N        | 761               | C to U                    | -                         | 1,2,3,4        |   |
|                         |                                    | NSs      | 908               | A to G                    | M to T                    | 1,2,3,4        |   |
|                         |                                    | NSs      | 1244              | C to U                    | R to K                    | 3              |   |
|                         |                                    | NSs      | 1409              | G to A                    | A to V                    | 2,4            |   |
|                         | M                                  | 78kD/NSm | 171               | G to A                    | E to K                    | 1,2,3,4        |   |
|                         |                                    | 78kD/NSm | 385               | A to G                    | D to G                    | 1,3            |   |
|                         |                                    | Gn       | 587               | C to U                    | -                         | 1,3,4          |   |
|                         |                                    | Gn       | 829               | A to G                    | K to R                    | 2              |   |
|                         |                                    | Gn       | 1149              | C to U                    | H to Y                    | 2,3,4          |   |
|                         |                                    | Gn       | 1204              | A to G                    | K to R                    | 2,3,4          |   |
|                         |                                    | Gn       | 1876              | A to G                    | N to S                    | 2,3,4          |   |
|                         |                                    | Gc       | 2646              | G to A                    | G to R                    | 1              |   |
|                         |                                    | 5' UTR   | 3648              | G to A                    | -                         | 3              |   |
|                         | L                                  | L        | 876               | U to C                    | -                         | 1              |   |
|                         |                                    | L        | 2553              | G to U                    | -                         | 1,2            |   |
|                         |                                    | L        | 5005              | U to C                    | Y to H                    | 1,2,3,4        |   |
|                         |                                    | L        | 6066              | U to C                    | -                         | 1,2,3,4        |   |
|                         | rMP12-ΔNSs16/198<br>Vero P25 Exp-1 | S        | NSs               | 891                       | U to A                    | S to C         | 3 |
|                         |                                    | M        | 78kD              | 99                        | G to A                    | E to K         | 2 |
| 78kD/NSm                |                                    |          | 361               | U to A                    | I to K                    | 3              |   |
| Gn                      |                                    |          | 877               | A to U                    | Q to L                    | 2,3,4          |   |
| Gn                      |                                    |          | 1165              | A to G                    | K to R                    | 1,3            |   |
| Gn                      |                                    |          | 1852              | A to G                    | K to G                    | 1,3            |   |
| Gn                      |                                    |          | 1861              | C to A                    | P to Q                    | 2,4            |   |
| Gc                      |                                    |          | 2907              | U to C                    | -                         | 1,2,3,4        |   |
| Gc                      |                                    |          | 2909              | G to C                    | L to F                    | 1,2,3,4        |   |
| L                       |                                    | L        | 231               | G to A                    | -                         | 3              |   |
|                         |                                    | L        | 3022              | A to G                    | T to A                    | 4              |   |
|                         |                                    | L        | 3750 <sup>3</sup> | A to G                    | I to M                    | 1,2,3,4        |   |
|                         |                                    | L        | 4584              | G to A                    | -                         | 2              |   |
|                         |                                    | L        | 4602              | G to A                    | -                         | 2              |   |
|                         |                                    | L        | 4971              | U to C                    | -                         | 1              |   |

<sup>1</sup>nt., nucleotide; <sup>2</sup>aa., amino acid. <sup>3</sup>Reversion mutation to parental ZH548 strain.

**Table S2. Primers and probes for droplet digital PCR analysis**

| Mutation site | Name <sup>2,3</sup> | Sequence <sup>1</sup>                                    |
|---------------|---------------------|----------------------------------------------------------|
| M-795         | HEX-MP-M795-BHQ     | 5'-HEX-AGT CAG CTC ATC ACC TCA ACA-BHQ-3'                |
|               | FAM-ZH-M795-BHQ     | 5'-FAM-AGT CAG CTC ATT ACC TCA ACA-BHQ-3'                |
|               | Taq-M795F           | 5'-ACA CAC TGT CCA AAT GAC TAC C-3'                      |
|               | Taq-M795R           | 5'-TAG GAG GGC ACT TGA CTG AA-3'                         |
| M-3564        | HEX-MP-M3564-BHQ    | 5'-HEX-ATA TAT CTT GGA <u>G</u> GA ACA GGC CT-BHQ-3'     |
|               | FAM-ZH-M3564-BHQ    | 5'-FAM-ATA TAT CTT GGA <u>A</u> GA ACA GGC CT-BHQ-3'     |
|               | Taq-M3564F          | 5'-TTG GGC TCT TTT TCC TCC TT-3'                         |
|               | Taq-M3564R          | 5'-CCT TCT TAG TGG CAG CAA GC-3'                         |
| L-533         | HEX-MP-L533-BHQ     | 5'-HEX-CAT GGT <u>G</u> CA TGG TCT AAT CTG G-BHQ-3'      |
|               | FAM-ZH-L533-BHQ     | 5'-FAM-CAT GGT <u>G</u> TA TGG TCT AAT CTG G-BHQ-3'      |
|               | Taq-L533F           | 5'-GCA GGA CTG TTG TTC TTT ACG-3'                        |
|               | Taq-L533R           | 5'-ACC TAT AAA CCA TCT CCT CTG CT-3'                     |
| L-3104        | HEX-MP-L3104-BHQ    | 5'-HEX-TGC TCA ATG TTT ACC <u>A</u> AG AAA AGG A -BHQ-3' |
|               | FAM-ZH-L3104-BHQ    | 5'-FAM-TGC TCA ATG TTT ACC <u>A</u> GG AAA AGG A-BHQ-3'  |
|               | Taq-L3104F          | 5'-GTG GCC GCT GAT CAT TAG G-3'                          |
|               | Taq-L3104R          | 5'-ATC AAG CTC CCG ATG ACC AT-3'                         |
| L-3750        | HEX-MP-L3750-BHQ    | 5'-HEX-CTC CTT AGC TGC AAT <u>A</u> AT TCA G-BHQ-3'      |
|               | FAM-ZH-L3750-BHQ    | 5'-FAM-CTC CTT AGC TGC AAT <u>G</u> AT TCA G-BHQ-3'      |
|               | Taq-L3750F          | 5'-GAA GTG GAA ACA CTA GTA GC-3'                         |
|               | Taq-L3750R          | 5'-TGT AAT GGA GAG TAC ACT GA-3'                         |

<sup>1</sup>A single nucleotide difference between two probes is underlined.

<sup>2</sup>HEX, hexachlorofluorescein; FAM, 6-carboxyfluorescein; BHQ, Black Hole Quencher-1.

<sup>3</sup>HEX and FAM probes specifically bind to MP-12 and ZH548 sequences, respectively.
